# Supplementary material
Source: PubMed Central journal article supplement (PMC7021251)

**a**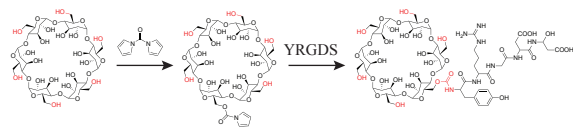**b**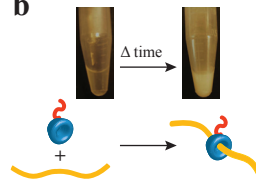**c**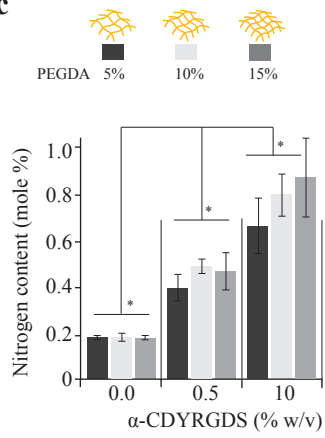**d**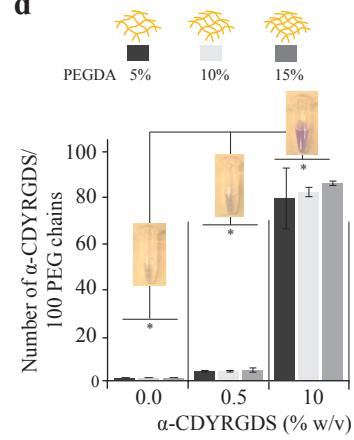

Supplement: NIHMS430883-supplement-Supplementary_Figure_1.pdf [file NIHMS430883-supplement-Supplementary_Figure_1.pdf]

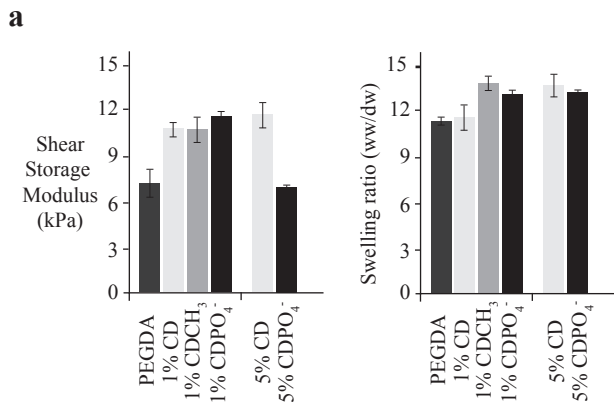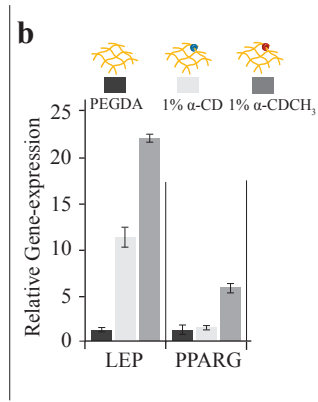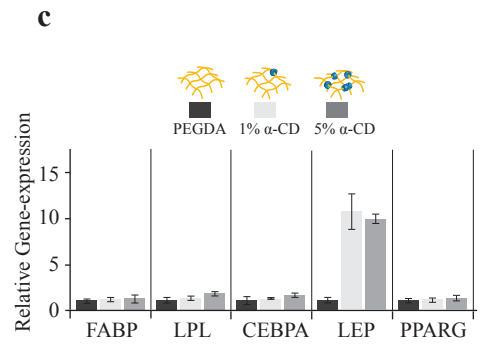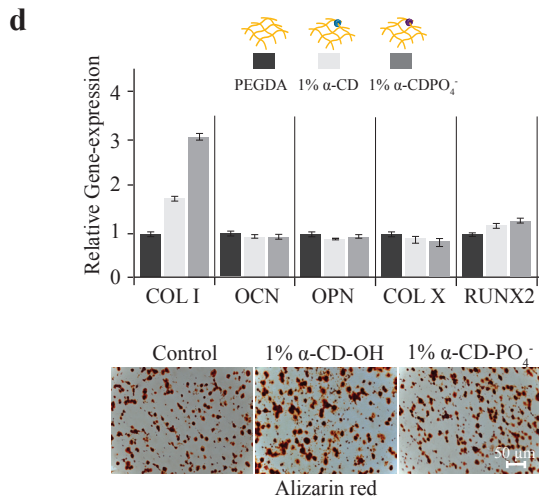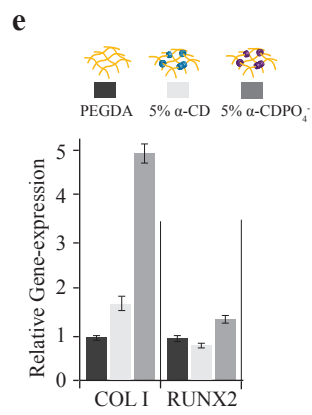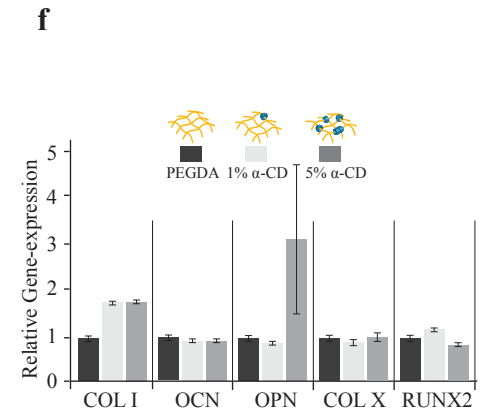

Supplement: NIHMS430883-supplement-Supplementary_Figure_2.pdf [file NIHMS430883-supplement-Supplementary_Figure_2.pdf]
